# Supplementary material
Source: ML conference proceedings conference paper supplement (https://proceedings.mlr.press/v139/chilkuri21a.html)
Supplement: Supplementary file 1 [file chilkuri21a-supp.pdf]

## Supplementary Materials

Table 7. Effect of removing the recurrent connections in the LMU, measured on psMNIST. We see that removing the recurrent connections ( $e_h, \mathbf{W}_h$ ) is beneficial, and although there is utility to having  $e_m$ , it unfortunately hinders parallelization.

| Model                    | Accuracy |
|--------------------------|----------|
| LMU (original)           | 97.15    |
| LMU (no $e_h$ )          | 97.27    |
| LMU (no $e_m$ )          | 96.82    |
| LMU (no $\mathbf{W}_h$ ) | 97.42    |
| LMU (no $\mathbf{W}_m$ ) | 20.10    |
| LMU (no $f$ )            | 89.81    |

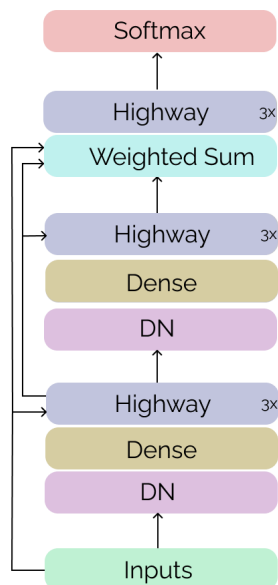

Figure 2. Illustration of the language model used for pre-training on the Amazon Reviews dataset. Although the actual model uses five blocks (combination of DN, Dense and Highway), we only show two blocks in the above figure.
